# Supplementary material for: Sol–gel chemistry in molten Brønsted acids towards “activated” carbons and beyond
Source: Royal Society of Chemistry journal article supplement (doi:10.1039/c9nr01722d), 2019-01-01
Supplement: c9nr01722d1.pdf [file c9nr01722d1.pdf]

## Sol-Gel Chemistry in Molten Brønsted Acids towards “Activated” Carbons and Beyond

Burak Koyutürk,<sup>a</sup> Josh Evans,<sup>a</sup> Hendrik Multhaupt,<sup>b</sup> Sören Selve,<sup>c</sup> Jan Ron Justin Simke,<sup>c</sup> Michael Wark<sup>b</sup> and Tim-Patrick Feller<sup>\*a</sup>

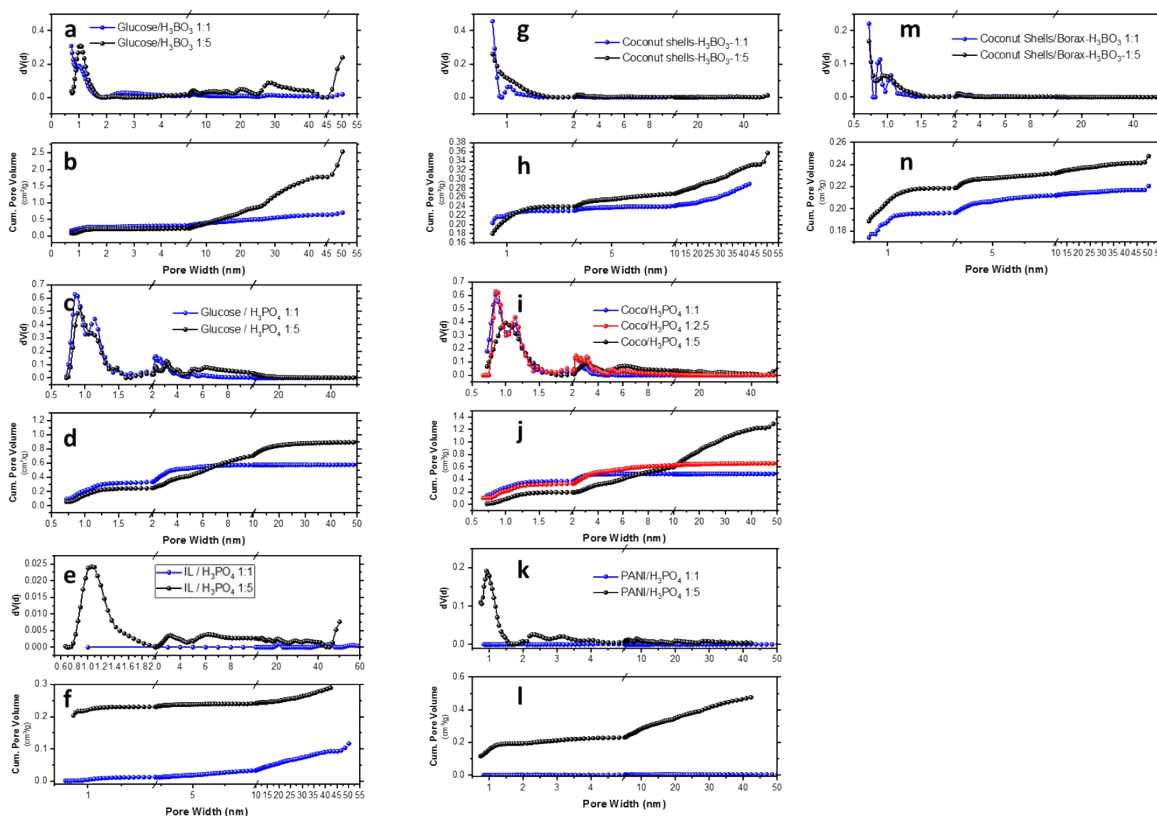

**Figure S1:** N<sub>2</sub> sorption derived pore size distributions and cumulative pore volumes of molecular precursor derived carbons: a,b) Glu-H<sub>3</sub>BO<sub>3</sub>; c,d) Glu-H<sub>3</sub>PO<sub>4</sub>; e,f) IL-H<sub>3</sub>PO<sub>4</sub>. Pore size distributions and cumulative pore volumes of polymeric precursor derived carbons: g,h) Coco-H<sub>3</sub>BO<sub>3</sub>; i,j) Coco-H<sub>3</sub>BO<sub>3</sub>; k,l) PANI-H<sub>3</sub>PO<sub>4</sub>; m,n) ) Coco-borax\_H<sub>3</sub>BO<sub>3</sub>.

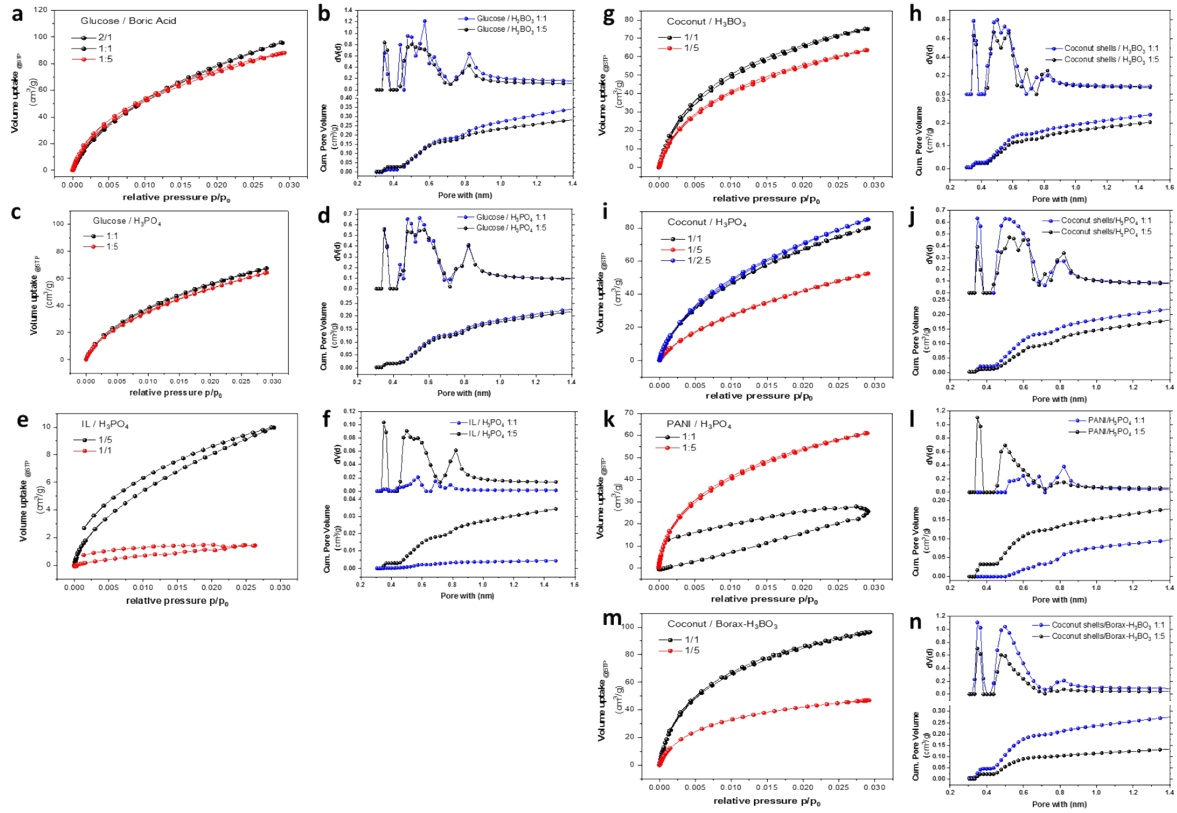

**Figure S2:** CO<sub>2</sub> sorption derived pore size distributions and cumulative pore volumes of molecular precursor derived carbons: a,b) Glu-H<sub>3</sub>BO<sub>3</sub>; c,d) Glu-H<sub>3</sub>PO<sub>4</sub>; e,f) IL-H<sub>3</sub>PO<sub>4</sub>. Pore size distributions and cumulative pore volumes of polymeric precursor derived carbons: g,h) Coco-H<sub>3</sub>BO<sub>3</sub>; i,j) Coco-H<sub>3</sub>BO<sub>3</sub>; k,l) PANI-H<sub>3</sub>PO<sub>4</sub>; m,n) ) Coco-borax\_H<sub>3</sub>BO<sub>3</sub>.

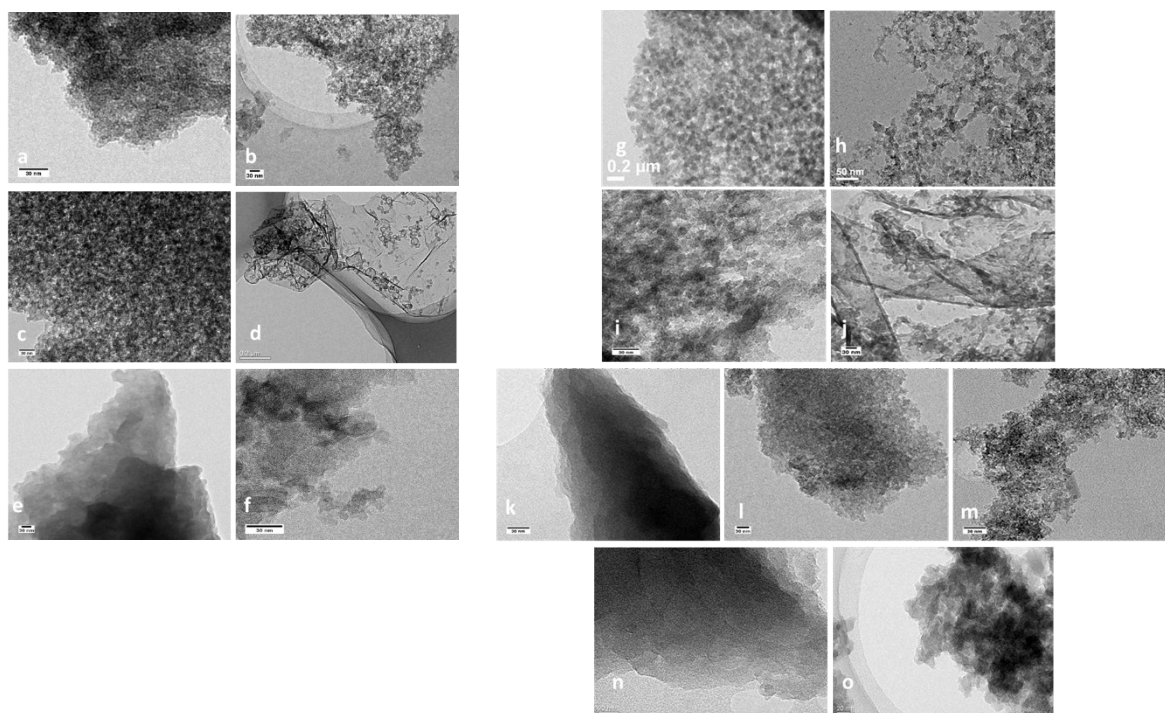

**Figure S3:** TEM images of a) Glu-H<sub>3</sub>PO<sub>4</sub>-1:1, b) Glu-H<sub>3</sub>PO<sub>4</sub>-1:5, c) Glu-H<sub>3</sub>BO<sub>3</sub>-1:1, d) Glu-H<sub>3</sub>BO<sub>3</sub>-1:5, e) IL-H<sub>3</sub>PO<sub>4</sub>-1:1, f) IL-H<sub>3</sub>PO<sub>4</sub>-1:5, g) Coco-H<sub>3</sub>BO<sub>3</sub>-1:1, h) Coco-H<sub>3</sub>BO<sub>3</sub>-1:5, i) Coco-borax-H<sub>3</sub>BO<sub>3</sub>-1:1, j) Coco-borax-H<sub>3</sub>BO<sub>3</sub>-1:5, k) Coco-H<sub>3</sub>PO<sub>4</sub>-1:1, l) Coco-H<sub>3</sub>PO<sub>4</sub>-1:2.5, m) Coco-H<sub>3</sub>PO<sub>4</sub>-1:5, n) PANI-H<sub>3</sub>PO<sub>4</sub> 1:1, o) PANI-H<sub>3</sub>PO<sub>4</sub> 1:5,

**Table S2:** Elemental analysis, N/C ratio, and total yield of all carbon products.

| Sample                                        | C     | H    | N     | S    | N/C  | Total yield |
|-----------------------------------------------|-------|------|-------|------|------|-------------|
| Coconut                                       | 47.88 | 6.10 | <0.1  | -    | -    | -           |
| Glucose (theo.)                               | 40.00 | 0.06 | -     | -    | -    | -           |
| EMIM DCA (theo.)                              | 54.00 | 0.06 | 0.40  | -    | 0.01 | -           |
| PANI                                          | 72.68 | 5.26 | 14.62 | 0.76 | 0.20 | -           |
| Glu-H <sub>3</sub> PO <sub>4</sub> 1-1        | 62.18 | 2.14 | <0.1  | -    | -    | 32.4        |
| Glu-H <sub>3</sub> PO <sub>4</sub> 1-5        | 63.80 | 1.64 | <0.1  | -    | -    | 27.3        |
| Glu-H <sub>3</sub> BO <sub>3</sub> 1-1        | 89.72 | 2.15 | <0.1  | -    | -    | 24.1        |
| Glu-H <sub>3</sub> BO <sub>3</sub> 1-5        | 89.24 | 1.88 | <0.1  | -    | -    | 27.4        |
| IL-H <sub>3</sub> PO <sub>4</sub> 1-1         | 24.23 | 2.85 | 8.49  | -    | 0.35 | -           |
| IL-H <sub>3</sub> PO <sub>4</sub> 1-5         | 24.89 | 1.46 | 3.97  | -    | 0.16 | -           |
| Coco-H <sub>3</sub> PO <sub>4</sub> 1-1       | 67.20 | 2.15 | 0.17  | -    | -    | 28.5        |
| Coco-H <sub>3</sub> PO <sub>4</sub> 1-2.5     | 72.45 | 1.41 | 0.22  | -    | -    | -           |
| Coco-H <sub>3</sub> PO <sub>4</sub> 1-5       | 62.53 | 1.81 | 0.21  | -    | -    | 38.1        |
| Coco-H <sub>3</sub> BO <sub>3</sub> 1-1       | 90.22 | 1.99 | 0.24  | -    | -    | -           |
| Coco-H <sub>3</sub> BO <sub>3</sub> 1-5       | 87.13 | 1.99 | 0.26  | -    | -    | 32          |
| PANI-H <sub>3</sub> PO <sub>4</sub> 1-1       | 42.99 | 1.85 | 6.22  | -    | 0.14 | 57          |
| PANI-H <sub>3</sub> PO <sub>4</sub> 1-5       | 48.22 | 1.66 | 5.20  | -    | 0.11 | 76          |
| Coco-borax-H <sub>3</sub> BO <sub>3</sub> 1-1 | 84.49 | 2.22 | 0.22  | -    | -    | 19.8        |
| Coco-borax-H <sub>3</sub> BO <sub>3</sub> 1-5 | 86.53 | 2.25 | 0.23  | -    | -    | 27.5        |

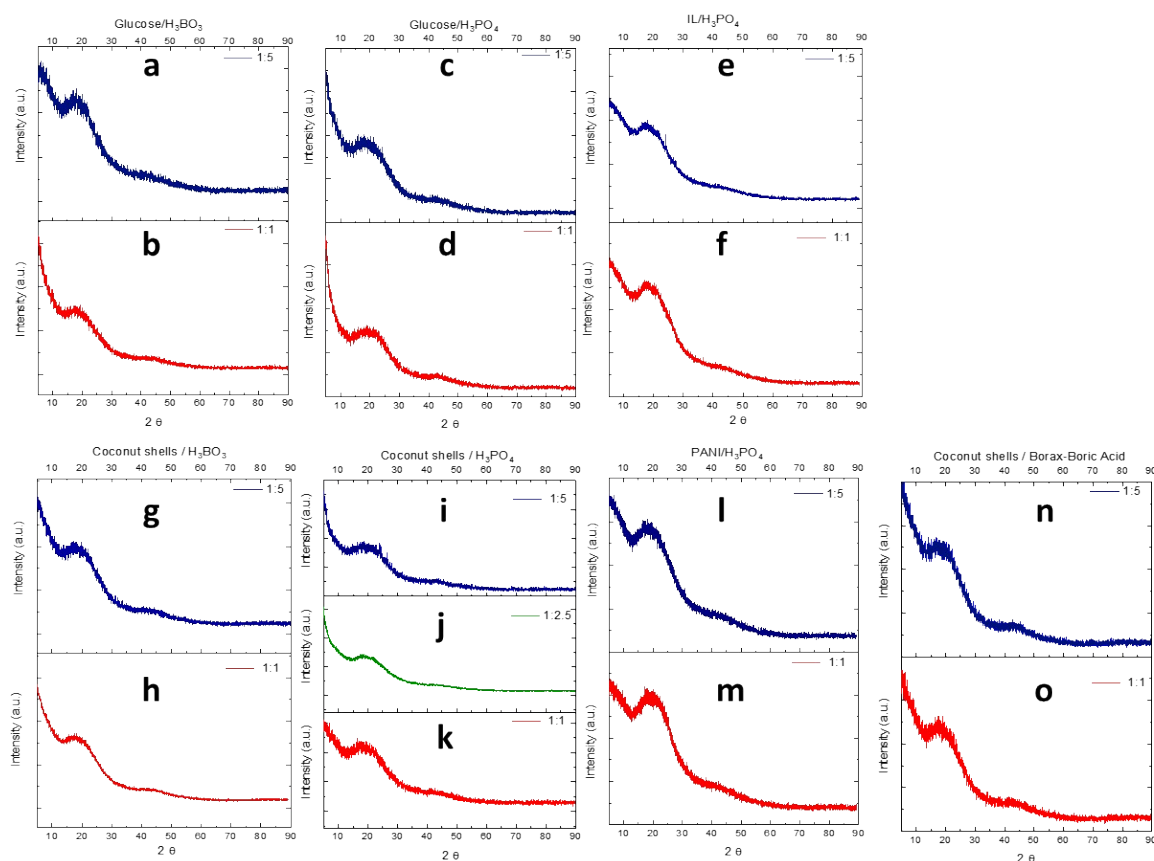

**Figure S4:** Powder XRD patterns of carbons synthesized from molecular precursors: a,b) Glu- $\text{H}_3\text{BO}_3$ ; c,d) Glu- $\text{H}_3\text{PO}_4$ ; e,f) IL- $\text{H}_3\text{PO}_4$ . The patterns of polymeric precursor derived carbons are shown in: g,h) Coco- $\text{H}_3\text{BO}_3$ ; i,j,k) Coco- $\text{H}_3\text{PO}_4$ ; l,m) PANI- $\text{H}_3\text{PO}_4$ ; n,o) Coco-borax\_ $\text{H}_3\text{BO}_3$ .
